# Supplementary material
Source: publisher figshare collection journal article supplement (https://gsajournals.figshare.com/ndownloader/files/24527426)
Supplement: Supplementary file 1 [file 24527426]

## Sheet: Sheet1
Library Exposed	Treatment	Primer Number	6 bp Barcode	Primer Sequence
No P450	D-1	5/6	CACACA	5' CAAGCAGAAGACGGCATACGAGCTCTTCCGATCTCACACAGATGTCCACGAGGTCTCT 3'
-	-	-	-	5' AATGATACGGCGACCACCGACACTCTTTCCCTACACGACGCTCTTCCGATCTCACACAGTCGACCTGCAGCGTACG 3'
-	-	-	-	-	-	-	-	-	-	-	-	-	-	-	-	-	-
-	D-2	9/10	ACACAC	5' CAAGCAGAAGACGGCATACGAGCTCTTCCGATCTACACACGATGTCCACGAGGTCTCT 3'
-	-	-	-	5' AATGATACGGCGACCACCGACACTCTTTCCCTACACGACGCTCTTCCGATCTACACACGTCGACCTGCAGCGTACG 3'
-	-	-	-	-	-	-	-	-	-	-	-	-	-	-	-	-	-
-	D-3	13/14	GTGTGT	5' CAAGCAGAAGACGGCATACGAGCTCTTCCGATCTGTGTGTGATGTCCACGAGGTCTCT 3'
-	-	-	-	5' AATGATACGGCGACCACCGACACTCTTTCCCTACACGACGCTCTTCCGATCTGTGTGTGTCGACCTGCAGCGTACG 3'
-	-	-	-	-	-	-	-	-	-	-	-	-	-	-	-	-	-
-	I-1	17/18	TGTGTG	5' CAAGCAGAAGACGGCATACGAGCTCTTCCGATCTTGTGTGGATGTCCACGAGGTCTCT 3'
-	-	-	-	5' AATGATACGGCGACCACCGACACTCTTTCCCTACACGACGCTCTTCCGATCTTGTGTGGTCGACCTGCAGCGTACG 3'
-	-	-	-	-	-	-	-	-	-	-	-	-	-	-	-	-	-
-	I-2	20/21	CAGATC	5' CAAGCAGAAGACGGCATACGAGCTCTTCCGATCTCAGATCGATGTCCACGAGGTCTCT 3'
-	-	-	-	5' AATGATACGGCGACCACCGACACTCTTTCCCTACACGACGCTCTTCCGATCTCAGATCGTCGACCTGCAGCGTACG 3'
-	-	-	-	-	-	-	-	-	-	-	-	-	-	-	-	-	-
-	I-3	24/25	ACTTGA	5' CAAGCAGAAGACGGCATACGAGCTCTTCCGATCTACTTGAGATGTCCACGAGGTCTCT 3'
-	-	-	-	5' AATGATACGGCGACCACCGACACTCTTTCCCTACACGACGCTCTTCCGATCTACTTGAGTCGACCTGCAGCGTACG 3'
-	-	-	-	-	-	-	-	-	-	-	-	-	-	-	-	-	-
CYP1A2	D-1	28/29	GATCAG	5' CAAGCAGAAGACGGCATACGAGCTCTTCCGATCTGATCAGGATGTCCACGAGGTCTCT 3'
-	-	-	-	5' AATGATACGGCGACCACCGACACTCTTTCCCTACACGACGCTCTTCCGATCTGATCAGGTCGACCTGCAGCGTACG 3'
-	-	-	-	-	-	-	-	-	-	-	-	-	-	-	-	-	-
-	D-2	32/33	TAGCTT	5' CAAGCAGAAGACGGCATACGAGCTCTTCCGATCTTAGCTTGATGTCCACGAGGTCTCT 3'
-	-	-	-	5' AATGATACGGCGACCACCGACACTCTTTCCCTACACGACGCTCTTCCGATCTTAGCTTGTCGACCTGCAGCGTACG 3'
-	-	-	-	-	-	-	-	-	-	-	-	-	-	-	-	-	-
-	D-3	36/37	GGCTAG	5' CAAGCAGAAGACGGCATACGAGCTCTTCCGATCTGGCTAGGATGTCCACGAGGTCTCT 3'
-	-	-	-	5' AATGATACGGCGACCACCGACACTCTTTCCCTACACGACGCTCTTCCGATCTGGCTAGGTCGACCTGCAGCGTACG 3'
-	-	-	-	-	-	-	-	-	-	-	-	-	-	-	-	-	-
-	A-1	40/41	CTTGTA	5' CAAGCAGAAGACGGCATACGAGCTCTTCCGATCTCTTGTAGATGTCCACGAGGTCTCT 3'
-	-	-	-	5' AATGATACGGCGACCACCGACACTCTTTCCCTACACGACGCTCTTCCGATCTCTTGTAGTCGACCTGCAGCGTACG 3'
-	-	-	-	-	-	-	-	-	-	-	-	-	-	-	-	-	-
-	A-2	44/45	GACTCT	5' CAAGCAGAAGACGGCATACGAGCTCTTCCGATCTGACTCTGATGTCCACGAGGTCTCT 3'
-	-	-	-	5' AATGATACGGCGACCACCGACACTCTTTCCCTACACGACGCTCTTCCGATCTGACTCTGTCGACCTGCAGCGTACG 3'
-	-	-	-	-	-	-	-	-	-	-	-	-	-	-	-	-	-
-	A-3	48/49	TCTGAC	5' CAAGCAGAAGACGGCATACGAGCTCTTCCGATCTTCTGACGATGTCCACGAGGTCTCT 3'
-	-	-	-	5' AATGATACGGCGACCACCGACACTCTTTCCCTACACGACGCTCTTCCGATCTTCTGACGTCGACCTGCAGCGTACG 3'
-	-	-	-	-	-	-	-	-	-	-	-	-	-	-	-	-	-
CYP1A2+NAT2 14	Da-1	100/101	GTCACA	5' CAAGCAGAAGACGGCATACGAGCTCTTCCGATCTGTCACAGATGTCCACGAGGTCTCT 3'
-	-	-	-	5' AATGATACGGCGACCACCGACACTCTTTCCCTACACGACGCTCTTCCGATCTGTCACAGTCGACCTGCAGCGTACG 3'
-	-	-	-	-	-	-	-	-	-	-	-	-	-	-	-	-	-
-	Da-2	104/105	ATGCTC	5' CAAGCAGAAGACGGCATACGAGCTCTTCCGATCTATGCTCGATGTCCACGAGGTCTCT 3'
-	-	-	-	5' AATGATACGGCGACCACCGACACTCTTTCCCTACACGACGCTCTTCCGATCTATGCTCGTCGACCTGCAGCGTACG 3'
-	-	-	-	-	-	-	-	-	-	-	-	-	-	-	-	-	-
-	Da-3	108/109	GACTGT	5' CAAGCAGAAGACGGCATACGAGCTCTTCCGATCTGACTGTGATGTCCACGAGGTCTCT 3'
-	-	-	-	5’ AATGATACGGCGACCACCGACACTCTTTCCCTACACGACGCTCTTCCGATCTGACTGTGTCGACCTGCAGCGTACG 3'
-	-	-	-	-	-	-	-	-	-	-	-	-	-	-	-	-	-
-	Di-1	112/113	GTCACT	5' CAAGCAGAAGACGGCATACGAGCTCTTCCGATCTGTCACTGATGTCCACGAGGTCTCT 3'
-	-	-	-	5’ AATGATACGGCGACCACCGACACTCTTTCCCTACACGACGCTCTTCCGATCTGTCACTGTCGACCTGCAGCGTACG 3'
-	-	-	-	-	-	-	-	-	-	-	-	-	-	-	-	-	-
-	Di-2	116/117	CAGCTA	5' CAAGCAGAAGACGGCATACGAGCTCTTCCGATCTCAGCTAGATGTCCACGAGGTCTCT 3'
-	-	-	-	5’ AATGATACGGCGACCACCGACACTCTTTCCCTACACGACGCTCTTCCGATCTCAGCTAGTCGACCTGCAGCGTACG 3'
-	-	-	-	-	-	-	-	-	-	-	-	-	-	-	-	-	-
-	Di-3	120/121	TCACGA	5' CAAGCAGAAGACGGCATACGAGCTCTTCCGATCTTCACGAGATGTCCACGAGGTCTCT 3'
-	-	-	-	5’ AATGATACGGCGACCACCGACACTCTTTCCCTACACGACGCTCTTCCGATCTTCACGAGTCGACCTGCAGCGTACG 3'
-	-	-	-	-	-	-	-	-	-	-	-	-	-	-	-	-	-
-	A-1	124/125	TGACTG	5' CAAGCAGAAGACGGCATACGAGCTCTTCCGATCTTGACTGGATGTCCACGAGGTCTCT 3'
-	-	-	-	5’ AATGATACGGCGACCACCGACACTCTTTCCCTACACGACGCTCTTCCGATCTTGACTGGTCGACCTGCAGCGTACG 3'
-	-	-	-	-	-	-	-	-	-	-	-	-	-	-	-	-	-
-	A-2	128/129	CGATGC	5' CAAGCAGAAGACGGCATACGAGCTCTTCCGATCTCGATGCGATGTCCACGAGGTCTCT 3'
-	-	-	-	5' AATGATACGGCGACCACCGACACTCTTTCCCTACACGACGCTCTTCCGATCTCGATGCGTCGACCTGCAGCGTACG 3'
-	-	-	-	-	-	-	-	-	-	-	-	-	-	-	-	-	-
-	A-3	132/133	ACTGAT	5' CAAGCAGAAGACGGCATACGAGCTCTTCCGATCTACTGATGATGTCCACGAGGTCTCT 3'
-	-	-	-	5' AATGATACGGCGACCACCGACACTCTTTCCCTACACGACGCTCTTCCGATCTACTGATGTCGACCTGCAGCGTACG 3'
-	-	-	-	-	-	-	-	-	-	-	-	-	-	-	-	-	-
-	I-1	136/137	ACGACT	5' CAAGCAGAAGACGGCATACGAGCTCTTCCGATCTACGACTGATGTCCACGAGGTCTCT 3'
-	-	-	-	5' AATGATACGGCGACCACCGACACTCTTTCCCTACACGACGCTCTTCCGATCTACGACTGTCGACCTGCAGCGTACG 3'
-	-	-	-	-	-	-	-	-	-	-	-	-	-	-	-	-	-
-	I-2	140/141	CACATG	5' CAAGCAGAAGACGGCATACGAGCTCTTCCGATCTCACATGGATGTCCACGAGGTCTCT 3'
-	-	-	-	5' AATGATACGGCGACCACCGACACTCTTTCCCTACACGACGCTCTTCCGATCTCACATGGTCGACCTGCAGCGTACG 3'
-	-	-	-	-	-	-	-	-	-	-	-	-	-	-	-	-	-
-	I-3	144/145	CATAGT	5' CAAGCAGAAGACGGCATACGAGCTCTTCCGATCTCATAGTGATGTCCACGAGGTCTCT 3'
-	-	-	-	5' AATGATACGGCGACCACCGACACTCTTTCCCTACACGACGCTCTTCCGATCTCATAGTGTCGACCTGCAGCGTACG 3'
-	-	-	-	-	-	-	-	-	-	-	-	-	-	-	-	-	-
-	U-1	148/149	GTATGC	5' CAAGCAGAAGACGGCATACGAGCTCTTCCGATCTGTATGCGATGTCCACGAGGTCTCT 3'
-	-	-	-	5' AATGATACGGCGACCACCGACACTCTTTCCCTACACGACGCTCTTCCGATCTGTATGCGTCGACCTGCAGCGTACG 3'
-	-	-	-	-	-	-	-	-	-	-	-	-	-	-	-	-	-
-	U-2	152/153	AGTCTG	5' CAAGCAGAAGACGGCATACGAGCTCTTCCGATCTAGTCTGGATGTCCACGAGGTCTCT 3'
-	-	-	-	5' AATGATACGGCGACCACCGACACTCTTTCCCTACACGACGCTCTTCCGATCTAGTCTGGTCGACCTGCAGCGTACG 3'
-	-	-	-	-	-	-	-	-	-	-	-	-	-	-	-	-	-
-	U-3	156/157	CGACTA	5' CAAGCAGAAGACGGCATACGAGCTCTTCCGATCTCGACTAGATGTCCACGAGGTCTCT 3'
-	-	-	-	5' AATGATACGGCGACCACCGACACTCTTTCCCTACACGACGCTCTTCCGATCTCGACTAGTCGACCTGCAGCGTACG 3'
-	-	-	-	-	-	-	-	-	-	-	-	-	-	-	-	-	-

## Sheet: Sheet2
TABLE 2. PRIMERS USED IN AMPLIFICATION OF UPTAG SEQUENCES
Index	Number	Sequence 1.
CACACA	1	5' CAAGCAGAAGACGGCATACGAGCTCTTCCGATCTCACACAGATGTCCACGAGGTCTCT3’
	2	5'AATGATACGGCGACCACCGACACTCTTTCCCTACACGACGCTCTTCCGATCTCACACAGTCGACCTGCAGCGTACG 3’
ACACAC	3	5'CAAGCAGAAGACGGCATACGAGCTCTTCCGATCTACACACGATGTCCACGAGGTCTCT 3'
	4	5'AATGATACGGCGACCACCGACACTCTTTCCCTACACGACGCTCTTCCGATCTACACACGTCGACCTGCAGCGTACG3'
GTGTGT	5	5'CAAGCAGAAGACGGCATACGAGCTCTTCCGATCTGTGTGTGATGTCCACGAGGTCTCT3'
	6	5'AATGATACGGCGACCACCGACACTCTTTCCCTACACGACGCTCTTCCGATCTGTGTGTGTCGACCTGCAGCGTACG'
TGTGTG	7	5' CAAGCAGAAGACGGCATACGAGCTCTTCCGATCTTGTGTGGATGTCCACGAGGTCTCT 3'
	8	5' AATGATACGGCGACCACCGACACTCTTTCCCTACACGACGCTCTTCCGATCTTGTGTGGTCGACCTGCAGCGTACG'
CAGATC	9	5’CAAGCAGAAGACGGCATACGAGCTCTTCCGATCTCAGATCGATGTCCACGAGGTCTCT3'
	10	5’AATGATACGGCGACCACCGACACTCTTTCCCTACACGACGCTCTTCCGATCT CAGATCGTCGACCTGCAGCGTACG3’
ACTTGA	11	5’CAAGCAGAAGACGGCATACGAGCTCTTCCGATCTACTTGAGATGTCCACGAGGTCTCT 3'
	12	5’AATGATACGGCGACCACCGACACTCTTTCCCTACACGACGCTCTTCCGATCT ACTTGAGTCGACCTGCAGCGTACG'3’
GATCAG	13	5’CAAGCAGAAGACGGCATACGAGCTCTTCCGATCTGATCAGGATGTCCACGAGGTCTCT3'
	14	5’AATGATACGGCGACCACCGACACTCTTTCCCTACACGACGCTCTTCCGATCT GATCAG GTCGACCTGCAGCGTACG3’
TAGCTT	15	5’CAAGCAGAAGACGGCATACGAGCTCTTCCGATCTTAGCTTGATGTCCACGAGGTCTCT3'
	16	5’AATGATACGGCGACCACCGACACTCTTTCCCTACACGACGCTCTTCCGATCT TAGCTT GTCGACCTGCAGCGTACG3'
GGCTAG	17	5’CAAGCAGAAGACGGCATACGAGCTCTTCCGATCTGGCTAGGATGTCCACGAGGTCTCT3'
	18	5’AATGATACGGCGACCACCGACACTCTTTCCCTACACGACGCTCTTCCGATCT GGCTAG GTCGACCTGCAGCGTACG3'
CTTGTA	19	5’CAAGCAGAAGACGGCATACGAGCTCTTCCGATCTCTTGTAGATGTCCACGAGGTCTCT3'
	20	5’AATGATACGGCGACCACCGACACTCTTTCCCTACACGACGCTCTTCCGATCT CTTGTAGTCGACCTGCAGCGTACG3’
GACTCT	21	5’CAAGCAGAAGACGGCATACGAGCTCTTCCGATCTGACTCTGATGTCCACGAGGTCTCT3'
	22	5’AATGATACGGCGACCACCGACACTCTTTCCCTACACGACGCTCTTCCGATCT GACTCTGTCGACCTGCAGCGTACG3’
TCTGAC	23	5’CAAGCAGAAGACGGCATACGAGCTCTTCCGATCTTCTGACGATGTCCACGAGGTCTCT3'
	24	5’AATGATACGGCGACCACCGACACTCTTTCCCTACACGACGCTCTTCCGATCTTCTGACGTCGACCTGCAGCGTACG3’
ATCGTA	25	5’CAAGCAGAAGACGGCATACGAGCTCTTCCGATCTATCGTAGATGTCCACGAGGTCTCT3'
	26	5’AATGATACGGCGACCACCGACACTCTTTCCCTACACGACGCTCTTCCGATCT ATCGTAGTCGACCTGCAGCGTACG3’
TACTGC	27	5’CAAGCAGAAGACGGCATACGAGCTCTTCCGATCTTACTGCGATGTCCACGAGGTCTCT3'
	28	5’AATGATACGGCGACCACCGACACTCTTTCCCTACACGACGCTCTTCCGATCT TACTGC GTCGACCTGCAGCGTACG3’
ACTGCT	29	5’CAAGCAGAAGACGGCATACGAGCTCTTCCGATCTACTGCTGATGTCCACGAGGTCTCT3'
	30	5’AATGATACGGCGACCACCGACACTCTTTCCCTACACGACGCTCTTCCGATCT ACTGCTGTCGACCTGCAGCGTACG3’
CGATAC	31	5’CAAGCAGAAGACGGCATACGAGCTCTTCCGATCTCGATACGATGTCCACGAGGTCTCT3'
	32	5’AATGATACGGCGACCACCGACACTCTTTCCCTACACGACGCTCTTCCGATCTCGATACGTCGACCTGCAGCGTACG3’
CAGTCA	33	5’CAAGCAGAAGACGGCATACGAGCTCTTCCGATCTCAGTCGATGTCCACGAGGTCTCT3'
	34	5’AATGATACGGCGACCACCGACACTCTTTCCCTACACGACGCTCTTCCGATCTCAGTCAGTCGACCTGCAGCGTACG3’
ACTGTG	35	5’CAAGCAGAAGACGGCATACGAGCTCTTCCGATCTACTGTGGATGTCCACGAGGTCTCT3'
	36	5’AATGATACGGCGACCACCGACACTCTTTCCCTACACGACGCTCTTCCGATCT ACTGTGGTCGACCTGCAGCGTACG3’
TGATGC	37	5’CAAGCAGAAGACGGCATACGAGCTCTTCCGATCTTGATGCGATGTCCACGAGGTCTCT3'
	38	5’AATGATACGGCGACCACCGACACTCTTTCCCTACACGACGCTCTTCCGATCT TGATGCGTCGACCTGCAGCGTACG3’
GTACAG	39	5’CAAGCAGAAGACGGCATACGAGCTCTTCCGATCTGTACAGGATGTCCACGAGGTCTCT3'
	40	5’AATGATACGGCGACCACCGACACTCTTTCCCTACACGACGCTCTTCCGATCT GTACAGGTCGACCTGCAGCGTACG3’
GTACTC	41	5’CAAGCAGAAGACGGCATACGAGCTCTTCCGATCTGTACTCGATGTCCACGAGGTCTCT3'
	42	5’AATGATACGGCGACCACCGACACTCTTTCCCTACACGACGCTCTTCCGATCT GTACTCGTCGACCTGCAGCGTACG3’
CTCGAT	43	5’CAAGCAGAAGACGGCATACGAGCTCTTCCGATCTCTCGATGATGTCCACGAGGTCTCT3'
	44	5’AATGATACGGCGACCACCGACACTCTTTCCCTACACGACGCTCTTCCGATCT CTCGATGTCGACCTGCAGCGTACG3’
CAGGTA	45	5’CAAGCAGAAGACGGCATACGAGCTCTTCCGATCTCAGGTAGATGTCCACGAGGTCTCT3'
	46	5’AATGATACGGCGACCACCGACACTCTTTCCCTACACGACGCTCTTCCGATCT CAGGTAGTCGACCTGCAGCGTACG3’
GTCTGA	47	5’CAAGCAGAAGACGGCATACGAGCTCTTCCGATCTGTCTGAGATGTCCACGAGGTCTCT3'
	48	5’AATGATACGGCGACCACCGACACTCTTTCCCTACACGACGCTCTTCCGATCT GTCTGAGTCGACCTGCAGCGTACG3’
GTCACA	49	5’CAAGCAGAAGACGGCATACGAGCTCTTCCGATCTGTCACAGATGTCCACGAGGTCTCT3'
	50	5’AATGATACGGCGACCACCGACACTCTTTCCCTACACGACGCTCTTCCGATCT GTCACAGTCGACCTGCAGCGTACG3’
ATGCTC	51	5’CAAGCAGAAGACGGCATACGAGCTCTTCCGATCTATGCTCGATGTCCACGAGGTCTCT3'
	52	5’AATGATACGGCGACCACCGACACTCTTTCCCTACACGACGCTCTTCCGATCT ATGCTC GTCGACCTGCAGCGTACG3’
1.Underline sequences are specific for use of the illumina sequencing platform, bold italicised sequences indicate the six base pair index assigned to specific experimental conditions
